# Supplementary material for: Armed Rollers: Does Nestling’s Vomit Function as a Defence against Predators?
Source: PLoS One. 2013 Jul 10;8(7):e68862. doi: 10.1371/journal.pone.0068862 (PMC3707886; doi:10.1371/journal.pone.0068862)
Supplement: Appendix S1 — Retention time (tR) and optimised mass spectrometric parameters for the detection of the compounds under study. (DOCX) [file pone.0068862.s001.docx]

Appendix S1. Retention time (tR) and optimised mass spectrometric parameters for the detection of the compounds under study. The quantification of the compounds was based on appropriate Multiple Reaction Monitoring (MRM) of ion pairs. Hy: L-hyoscyamine; HBA: Hydroxybenzoic acid; HCA: Hydroxycinnamic acid; Ps: Psoralen; 8M: Dihydronepetalactone; Bg: Bergapten.

| **Compound** | **tR (min)** | **Ionization Mode** | **Cone (V)** | **Collision Energy (eV)** | **MRM** |
| --- | --- | --- | --- | --- | --- |
| Hy | 1.2 | ES+ | 40 | 25 | 290.30 → 124.23 |
| HBA | 1.8 | ES- | 30 | 15 | 137.00 → 93.05 |
| HCA | 2.2 | ES- | 25 | 15 | 163.10 → 118.96 |
| Ps | 6.8 | ES+ | 40 | 25 | 187.00 → 131.16 |
| 8M | 7.4 | ES+ | 40 | 20 | 217.17 → 161.10 |
| Bg | 9.0 | ES+ | 40 | 20 | 217.17 → 202.03 |
